# Supplementary material
Source: PubMed Central journal article supplement (PMC4159152)
Supplement: supp_ddu226_ddu226supp_data.pdf [file supp_ddu226_ddu226supp_data.pdf]

## Whole exome sequencing identifies variants in families with macular degeneration

**Yi Yu,<sup>1, 13</sup> Michael P. Triebwasser,<sup>2, 13</sup> Edwin K. S. Wong,<sup>3, 13</sup>  
Elizabeth C. Schramm,<sup>2, 13</sup> Brett Thomas,<sup>4</sup> Robyn Reynolds,<sup>1</sup> Elaine Mardis,<sup>5</sup> John P. Atkinson,  
<sup>2</sup> Mark Daly,<sup>4,6</sup> Soumya Raychaudhuri,<sup>6-10</sup> David Kavanagh,<sup>3</sup> Johanna M. Seddon<sup>1,11, 12</sup>**

<sup>1</sup>Ophthalmic Epidemiology and Genetics Service, New England Eye Center,  
Tufts Medical Center, Boston, Massachusetts, USA.

<sup>2</sup>Division of Rheumatology, Department of Medicine, Washington University  
School of Medicine, St. Louis, MO, USA

<sup>3</sup>Institute of Genetic Medicine, Newcastle University, International Centre for Life, Newcastle upon  
Tyne, UK

<sup>4</sup>Analytic and Translational Genetics Unit, Massachusetts General Hospital, Boston, Massachusetts,  
USA.

<sup>5</sup>The Genome Institute at Washington University, Saint Louis, MO, USA

<sup>6</sup>Program in Medical and Population Genetics, Broad Institute, Cambridge, Massachusetts, USA

<sup>7</sup>Partners HealthCare Center for Personalized Genetic Medicine, Boston, Massachusetts, USA.

<sup>8</sup>Division of Genetics, Brigham and Women's Hospital, Boston, Massachusetts, USA.

<sup>9</sup>Division of Rheumatology, Immunology, and Allergy, Brigham and Women's Hospital, Boston,  
Massachusetts, USA.

<sup>10</sup>Faculty of Medical and Human Sciences, University of Manchester, Manchester, UK

<sup>11</sup>Department of Ophthalmology, Tufts University School of Medicine, Boston,  
Massachusetts, USA.

<sup>12</sup>Sackler School of Graduate Medical Sciences, Tufts University, Boston, MA, USA

<sup>13</sup>These authors contributed equally to this work.

Correspondence: [jseddon@tuftsmedicalcenter.org](mailto:jseddon@tuftsmedicalcenter.org)

**Supplementary Table S1-Other potential pathogenic variants suggested by XBrowse.**

| FAM                                                                                   | Genes     | Location       | REF | ALT | RSID        | Amino Acid | Allele Frequencies in ESP | LOD score | Polyphen2 | SIFT        |
|---------------------------------------------------------------------------------------|-----------|----------------|-----|-----|-------------|------------|---------------------------|-----------|-----------|-------------|
| Variants predicted to be both probably damaging by PolyPhen2 and deleterious by SIFT  |           |                |     |     |             |            |                           |           |           |             |
| I                                                                                     | MUC4      | chr3:195490456 | T   | G   | .           | N4573H     | 0                         | -0.90     | prob.dam. | deleterious |
| IV                                                                                    | CCT4      | chr2:62106083  | A   | C   | .           | L148W      | 0.0002                    | -5.40     | prob.dam. | deleterious |
| IV                                                                                    | CNTN3     | chr3:74316451  | G   | A   | .           | A928V      | 0                         | -7.89     | prob.dam. | deleterious |
| IV                                                                                    | ALDH1L1   | chr3:125865723 | G   | A   | rs144099397 | S344F      | 0.0005                    | -1.80     | prob.dam. | deleterious |
| VI                                                                                    | MFN2      | chr1:12067297  | A   | G   | .           | Q687R      | 0                         | 0.65      | prob.dam. | deleterious |
| VI                                                                                    | TAB2      | chr6:149700430 | C   | T   | .           | T460M      | 0                         | 0.65      | prob.dam. | deleterious |
| VI                                                                                    | NOL11     | chr17:65716047 | A   | T   | .           | D94V       | 0                         | 0.65      | prob.dam. | deleterious |
| VIII                                                                                  | AGT       | chr1:230841679 | C   | T   | rs74315283  | R375Q      | 0                         | -1.80     | prob.dam. | deleterious |
| VIII                                                                                  | EPSTI1    | chr13:43543310 | G   | A   | .           | A84V       | 0.0001                    | -1.80     | prob.dam. | deleterious |
| IX                                                                                    | GRM7      | chr3:6903211   | G   | C   | .           | E46Q       | 0                         | -0.30     | prob.dam. | deleterious |
| IX                                                                                    | MTMR14    | chr3:9730694   | C   | T   | .           | P454L      | 0                         | -0.30     | prob.dam. | deleterious |
| IX                                                                                    | CDAN1     | chr15:43020878 | C   | T   | rs200401359 | G926R      | 0                         | -0.30     | prob.dam. | deleterious |
| IX                                                                                    | ZNF836    | chr19:52659758 | T   | A   | .           | K393M      | 0                         | -0.30     | prob.dam. | deleterious |
| Variants predicted to be either probably damaging by PolyPhen2 or deleterious by SIFT |           |                |     |     |             |            |                           |           |           |             |
| I                                                                                     | KIF20B    | chr10:91477454 | G   | A   | rs149456198 | V416I      | 0.0005                    | 1.20      | benign    | deleterious |
| II                                                                                    | PDLIM7    | chr5:176917023 | C   | T   | .           | R217H      | 0                         | 1.22      | NA        | deleterious |
| III                                                                                   | CLASRP    | chr19:45561058 | T   | C   | .           | V172A      | 0                         | -0.80     | prob.dam. | tolerated   |
| III                                                                                   | TULP4     | chr6:158923961 | C   | T   | rs140116628 | T1089M     | 0.0003                    | -4.40     | benign    | deleterious |
| VI                                                                                    | ARHGEF10L | chr1:17961406  | G   | C   | .           | V608L      | 0                         | 0.90      | poss.dam. | deleterious |
| VI                                                                                    | TPO       | chr2:1546296   | C   | T   | .           | R908C      | 0.0001                    | 0.90      | poss.dam. | deleterious |
| VII                                                                                   | OR1C1     | chr1:247920937 | C   | T   | .           | V258I      | 0.0001                    | -3.06     | poss.dam. | deleterious |
| VII                                                                                   | DDHD2     | chr8:38097798  | C   | A   | .           | P210T      | 0.0002                    | -2.65     | poss.dam. | deleterious |

|      |          |                 |   |   |             |        |        |       |           |             |
|------|----------|-----------------|---|---|-------------|--------|--------|-------|-----------|-------------|
| VII  | SYT8     | chr11:1857324   | C | A | .           | A156D  | 0      | -8.40 | poss.dam. | deleterious |
| VIII | ABCA9    | chr17:67045529  | G | C | rs150105567 | R67G   | 0.0006 | 0.65  | poss.dam. | deleterious |
| VIII | DNAH17   | chr17:76482076  | G | A | rs181353842 | P2414L | 0.0008 | 0.65  | benign    | deleterious |
| VIII | IGLC7    | chr22:23265006  | C | T | .           | S81F   | 0      | 0.65  | poss.dam. | deleterious |
| IX   | GRM7     | chr3:6903211    | G | C | .           | E46Q   | 0      | 0.65  | prob.dam. | tolerated   |
| IX   | HLX      | chr1:221053633  | G | A | .           | G1935D | 0.0001 | 0.65  | benign    | deleterious |
| IX   | SLC25A47 | chr14:100795151 | C | T | rs201454370 | S139L  | 0.0004 | 0.65  | benign    | deleterious |
| IX   | LRBA     | chr4:151357949  | T | A | rs147096866 | D2294V | 0.0002 | 0.65  | poss.dam. | deleterious |

FAM, family; Ref, reference allele; Alt, alternative allele; rsID, rs number; ESP, exome sequencing project; prob.dam., probably damaging; poss.dam., possibly damaging.

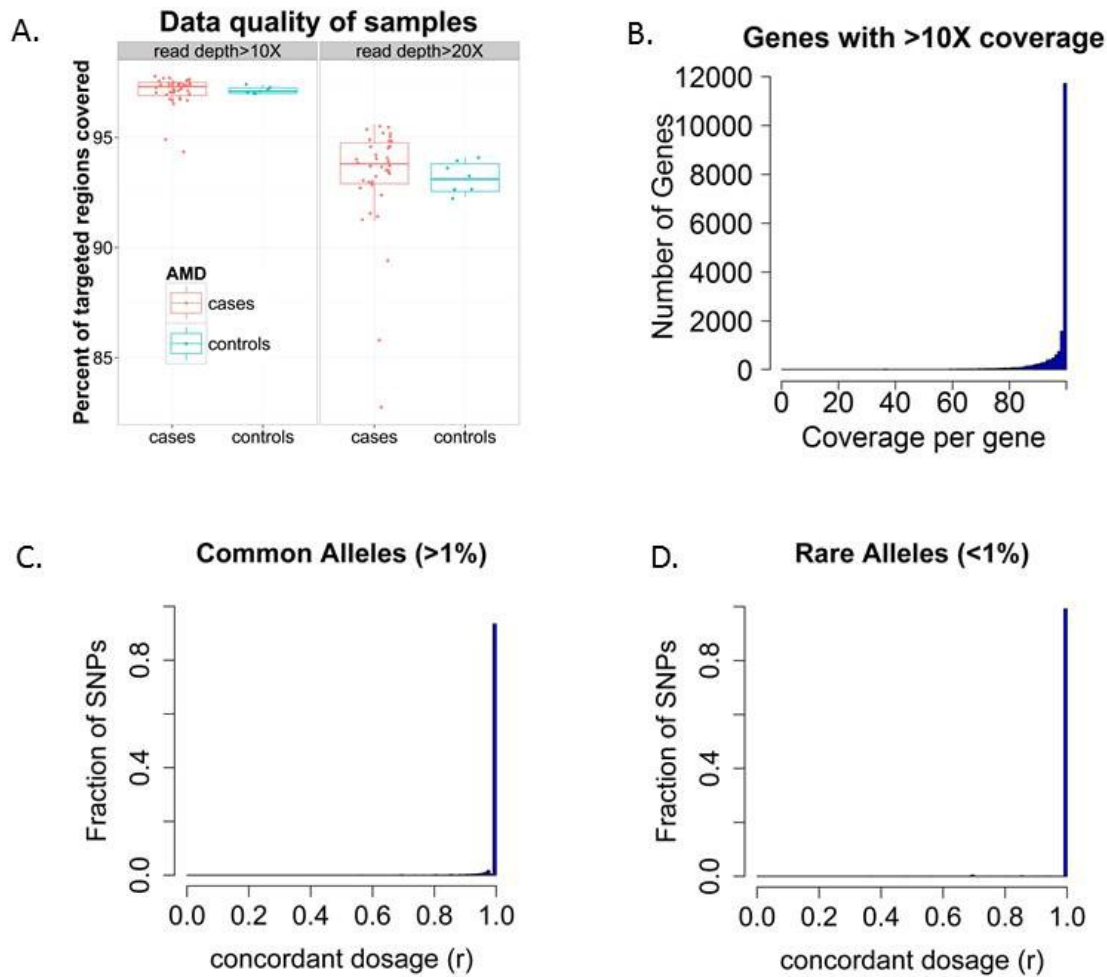

**Supplemental Figure 1. Exome sequencing coverage and genotypes concordance.**

(A) All sequenced samples were required to have over 10X coverage at greater than 90% of the targeted regions (median = 97.25%) and over 20X coverage at greater than 80% of the targeted regions (median = 93.7%); (B) Distribution of the percent regions covered at >10X depth for each gene; (C,D) Histogram of correlations between minor allele dosages at 2,426 SNPs as determined by sequence-based and exome-array-based genotyping for common alleles (>1% frequency) and rare alleles (<1% frequency).

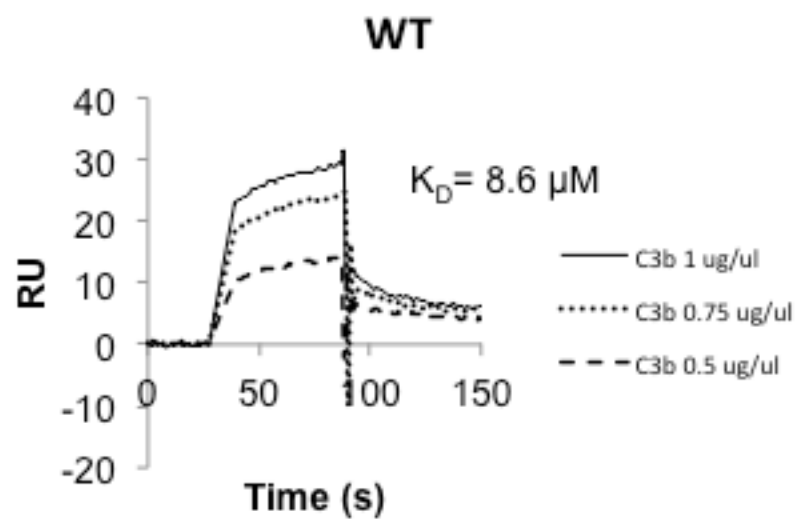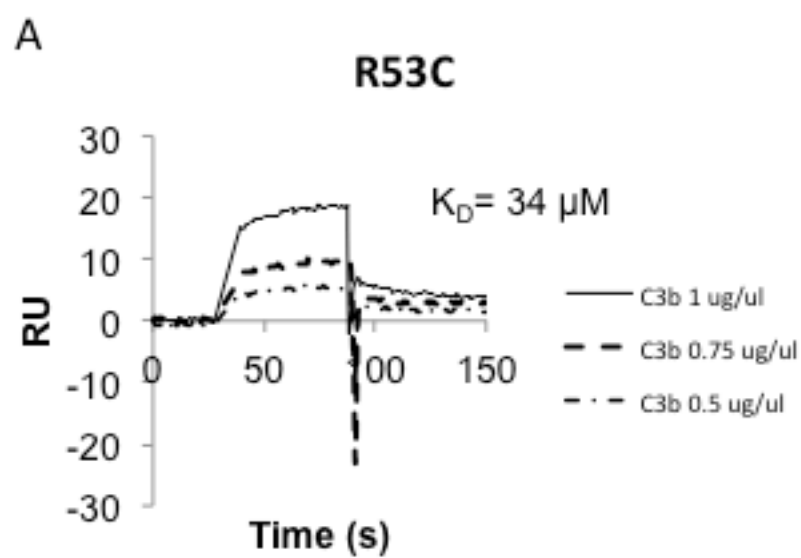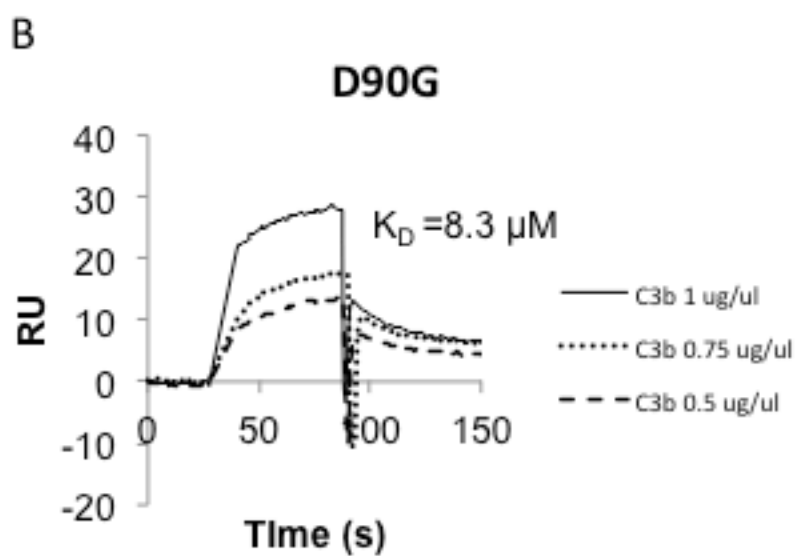

**C**

**Supplemental Figure 2. CFHR53C, but not CFHD90G, demonstrates a weaker affinity for C3b compared to CFHWT.**

Overlaying sensograms show the steady state response for the binding of C3b (1-5  $\mu$ M) to CFH1-4 proteins immobilized on a CM5 sensor chip. Response was plotted against concentration and the  $K_D$  was calculated using the 1:1 binding model in the BIAeval software.

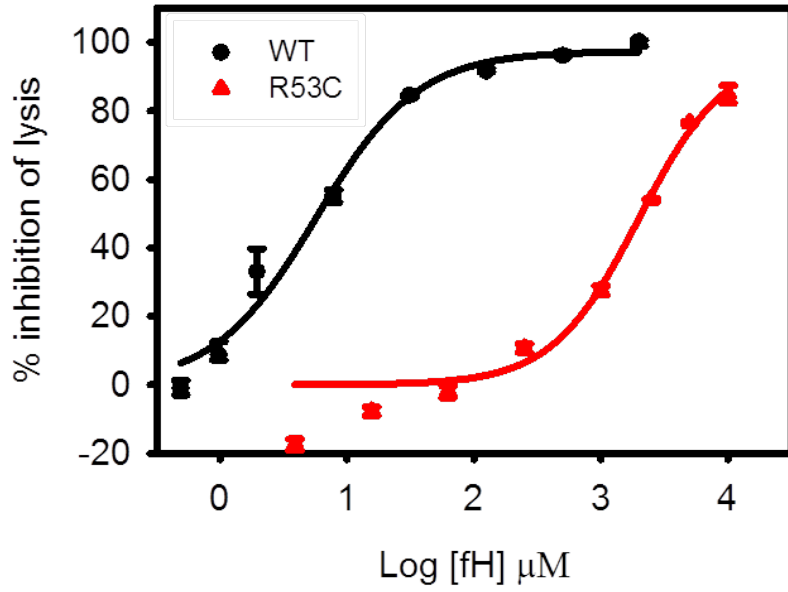

**Supplemental Figure 3. Hemolytic experiments confirm R53C's decay accelerating activity.** In assays using sheep erythrocyte lysis, the decay defect of R53C is clear. 50% inhibition of lysis was achieved using 6.0 nM of WT. In contrast, 2000 nM (>300-fold more) was required using R53C.

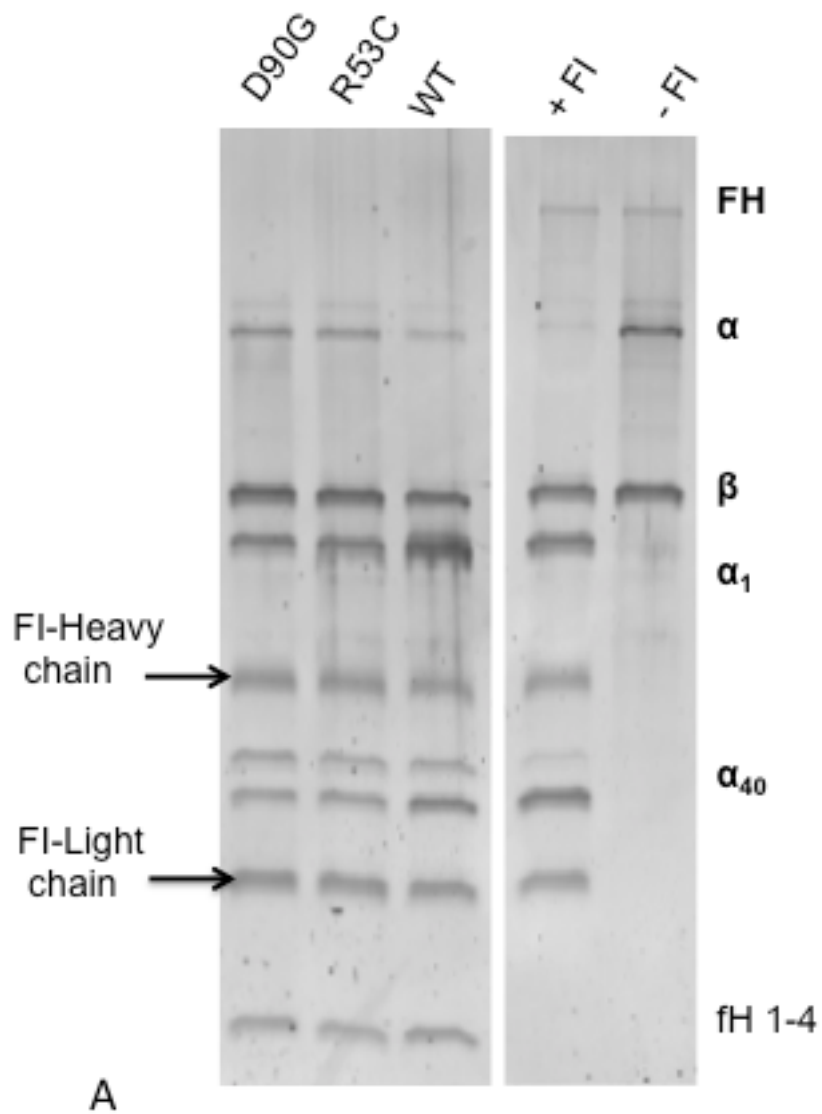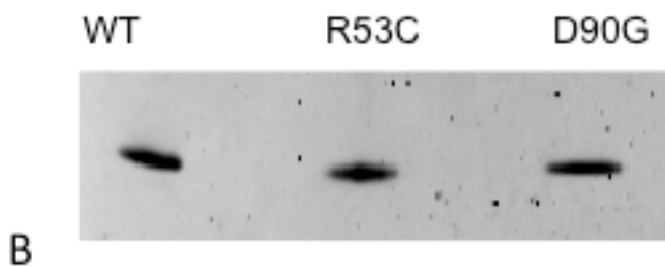

**Supplemental Figure 4. Representative gel of fluid phase cofactor assay.**

(A) Representative gel shows that both mutants clearly fail to cleave  $\alpha'$  at the same rate as WT and that as a result more  $\alpha'$  remains and less  $\alpha_1$  and less  $\alpha_{40}$  are generated (10% Tris-Gly SDS). (B) Equal amounts of each cofactor protein was present in each reaction (separate 12% Tris-Gly SDS).
